# Supplementary material
Source: Springer Nature journal article supplement (https://www.springermedizin.de/resource/supplementary/12885_2013_4349_MOESM1_ESM.pdf/9466054)
Supplement: MOESM1 [file 9466054]

**TABLE S1: ANTIBODY LIST**

| <u>Protein</u>                      | <u>RPPA<br/>Abbreviation</u> | <u>Phosphorylation<br/>Site</u> | <u>Company</u> | <u>Cat #</u> | <u>RPPA<br/>Concentration</u> | <u>Antibody<br/>Status**</u> |
|-------------------------------------|------------------------------|---------------------------------|----------------|--------------|-------------------------------|------------------------------|
| 1 4EBP1                             | 4EBP1                        |                                 | Cell Signaling | 9452         | 1:250                         | V                            |
| 2 4EBP1                             | 4EBP1pT37 T46                | T37 T46                         | Cell Signaling | 9459         | 1:500                         | V                            |
| 3 4EBP1                             | 4EBP1pS65                    | S65                             | Cell Signaling | 9456         | 1:250                         | V                            |
| 4 acetyl Co-A carboxylase alpha (1) | ACC1                         |                                 | Epitomics      | 1768-1       | 1:300                         | C                            |
| 5 acetyl Co-A carboxylase alpha (1) | ACCpS79                      | S79                             | Cell Signaling | 3661         | 1:500                         | V                            |
| 6 AKT                               | AKT                          |                                 | Cell Signaling | 9272         | 1:250                         | V                            |
| 7 AKT                               | AKTpS473                     | S473                            | Cell Signaling | 9271         | 1:250                         | V                            |
| 8 AKT                               | AKTpT308                     | T308                            | Cell Signaling | 9275         | 1:250                         | V                            |
| 9 Alpha-catenin*                    | αCatenin                     |                                 | EMD Millipore  | 1030         | 1:3000                        | V                            |
| 10 AMPK                             | AMPK                         |                                 | Cell Signaling | 2532         | 1:250                         | C                            |
| 11 AMPK                             | AMPKpT172                    | T172                            | Cell Signaling | 2535         | 1:200                         | V                            |
| 12 Androgen Receptor                | AR                           |                                 | Epitomics      | 1852         | 1:100                         | V                            |
| 13 ataxia telangiectasia mutated    | ATM                          |                                 | Abcam          | 32420        | 1:1000                        | C                            |
| 14 ATR interacting protein          | ATRIP                        |                                 | Cell Signaling | 2737         | 1:100                         | C                            |
| 15 BAD                              | BADpS112                     | S112                            | Cell Signaling | 9291         | 1:200                         | V                            |
| 16 Bcl-2                            | BCL2                         |                                 | Epitomics      | 1017-1       | 1:500                         | V                            |
| 17 BCL2L1                           | Bcl-xL                       |                                 | Cell Signaling | 2762         | 1:250                         | V                            |
| 18 β-Catenin                        | B Catenin                    |                                 | Cell Signaling | 9562         | 1:250                         | V                            |
| 19 BIM                              | BIM                          |                                 | Epitomics      | 1036         | 1:500                         | V                            |
| 20 B-raf                            | BRAF                         |                                 | Santa Cruz     | 5284         | 1:250                         | C                            |
| 21 Caspase 7 (cleaved)              | ClCasp 7                     |                                 | Cell Signaling | 9491         | 1:250                         | C                            |
| 22 Caveolin 1                       | CAV1                         |                                 | Cell Signaling | 3238         | 1:250                         | V                            |
| 23 Collagen VI                      | Collagen VI                  |                                 | Santa Cruz     | 20649        | 1:250                         | V                            |
| 24 Cyclin B1                        | CCNB1                        |                                 | Epitomics      | 1495         | 1:500                         | V                            |
| 25 Cyclin D1                        | CCND1                        |                                 | Santa Cruz     | 718          | 1:1000                        | V                            |
| 26 Cyclin E1                        | CCNE1                        |                                 | Santa Cruz     | 247          | 1:250                         | V                            |
| 27 Cyclin E2                        | CCNE2                        |                                 | Epitomics      | 1142         | 1:200                         | C                            |
| 28 CD31                             | CD31                         |                                 | Dako           | M0823        | 1:750                         | V                            |
| 29 E-Cadherin                       | CDH1                         |                                 | Cell Signaling | 4065         | 1:200                         | V                            |
| 30 checkpoint kinase 1              | CHK1                         |                                 | Cell Signaling | 2345         | 1:100                         | C                            |
| 31 checkpoint kinase 2              | CHK2                         |                                 | Cell Signaling | 3440         | 1:100                         | C                            |
| 32 checkpoint kinase 1              | CHK1pS345                    | S345                            | Cell Signaling | 2348         | 1:100                         | C                            |
| 33 c-Jun                            | c-Jun                        |                                 | Cell Signaling | 9165         | 1:150                         | VP                           |

|    | <u>Protein</u>                         | <u>RPPA</u>                  | <u>Phosphorylation</u> | <u>Company</u>           | <u>Cat #</u> | <u>RPPA</u> | <u>Antibody</u> |
|----|----------------------------------------|------------------------------|------------------------|--------------------------|--------------|-------------|-----------------|
| 34 | c-Jun                                  | c-JunpS73                    | S73                    | Cell Signaling           | 9164         | 1:100       | V               |
| 35 | C-KIT                                  | c-KIT                        |                        | Epitomics                | 1522-1       | 1:1000      | V               |
| 36 | C-MYC                                  | c-Myc                        |                        | Cell Signaling           | 9402         | 1:100       | C               |
| 37 | Cofilin-1 (non-muscle)                 | CofilinpS3                   | S3                     | Cell Signaling           | 3313-S       | 1:500       | VP              |
| 38 | cytochrome c oxidase subunit II        | COX2                         |                        | Epitomics                | 2969         | 1:500       | C               |
| 39 | E-Cadherin                             | Ecadherin                    |                        | Cell Signaling           | 3195         | 1;250       | V               |
| 40 | EGFR                                   | EGFR                         |                        | Cell Signaling           | 2232         | 1:200       | V               |
| 41 | EGFR                                   | EGFRpY1173                   |                        | Epitomics                | 1124         | 1:100       | V               |
| 42 | Eukaryotic translation initiation fact | EIF4E                        |                        | Cell Signaling           | 9742         | 1:200       | V               |
| 43 | Estrogen induced gene                  | EIG121                       |                        | Provided by collaborator |              | 1:500       | C               |
| 44 | E74-like factor 2                      | ELF2ApS51                    | S51                    | Cell Signaling           | 9721S        | 1:100       | VP              |
| 45 | member of ETS oncogene family          | ELK1pS383                    | S383                   | Cell Signaling           | 9181         | 1:250       | C               |
| 46 | Estrogen Receptor Alpha                | ERap167                      | S167                   | Cell Signaling           | 2514         | 1:200       | VP              |
| 47 | Estrogen Receptor Alpha                | ERapS118                     | S118                   | Epitomics                | 1091-1       | 1:300       | V               |
| 48 | Estrogen Receptor Alpha                | Era                          |                        | Neomarkers               | RM-9101-1    | 1:200       | V               |
| 49 | Fibronectin                            | Fibronectin                  |                        | Epitomics                | 1574-1       | 1:500       | V               |
| 50 | FORTILIN                               | Fortilin                     |                        | Provided by R. Chambers  |              | 1:5000      | C               |
| 51 | FOXO3A                                 | FKHRL1                       |                        | Cell Signaling           | 9467         | 1:500       | VP              |
| 52 | FOXO3A                                 | FKHRL1pS318 S321             | S318 S321              | Cell Signaling           | 2402         | 1:250       | C               |
| 53 | mTOR                                   | FRAP1                        |                        | Cell Signaling           | 2983         | 1:800       | V               |
| 54 | GRB2-associated binding protein2       | GAB2                         |                        | Cell Signaling           | 3239         | 1:500       | V               |
| 55 | GATA-2                                 | GATA-2                       |                        | Sigma                    |              | 1:100       | VP              |
| 56 | GATA-3                                 | GATA-3                       |                        | BD Bioscience            | 558686       | 1:100       | V               |
| 57 | GSK-3 $\beta$                          | GSK-3 $\beta$ pS9            | S9                     | Cell Signaling           | 9336         | 1:500       | V               |
| 58 | GSK-3 $\alpha/\beta$                   | GSK-3 $\alpha/\beta$ pS21 S9 | S21 S9                 | Cell Signaling           | 9331         | 1:250       | V               |
| 59 | Heat Shock Protein 27                  | HSP27                        |                        | Cell Signaling           | 2402         | 1:250       | C               |
| 60 | Heat Shock Protein 70                  | HSP70                        |                        | Cell Signaling           | 4872         | 1:250       | C               |
| 61 | IGFBP2                                 | IGFBP2                       |                        | Cell Signaling           | 3922         | 1:100       | V               |
| 62 | IGFR $\beta$                           | IGFR $\beta$                 |                        | Cell Signaling           | 3027         | 1:250       | C               |
| 63 | Insulin receptor substrate 1           | IRS1                         |                        | UBI                      | 06-248       | 1:1000      | V               |
| 64 | lymphocyte-specific protein tyrosin    | LCK                          |                        | Cell Signaling           | 2752         | 1:500       | C               |
| 65 | ERK1/ERK2                              | MAPKpT202 Y204               | T202 Y204              | Cell Signaling           | 4377         | 1:800       | V               |
| 66 | MEK                                    | MEK1                         |                        | Epitomics                | 1235-1       | 1:5000      | V               |
| 67 | MEK                                    | MEK1&2pS217 S221             | S217 S221              | Cell Signaling           | 9154         | 1:1000      | V               |
| 68 | MIG-6 (mitogen-inducible gene          | MIG-6                        |                        | Sigma                    |              | 1:200       | V               |
| 69 | mTOR                                   | mTOR                         |                        | Cell Signaling           | 2983         | 1:250       | V               |
| 70 | mTOR                                   | mTORpS2448                   | S2448                  | Cell Signaling           | 2971         | 1:500       | C               |

| <u>Protein</u>                   | <u>RPPA</u>         | <u>Phosphorylation</u> | <u>Company</u> | <u>Cat #</u> | <u>RPPA</u> | <u>Antibody</u> |
|----------------------------------|---------------------|------------------------|----------------|--------------|-------------|-----------------|
| 71 NOTCH3                        | NOTCH3              |                        | Cell Signaling | 3268         | 1:100       | C               |
| 72 P21                           | p21                 |                        | Santa Cruz     | 397          | 1:100       | V               |
| 73 P27                           | p27                 |                        | Epitomics      | 1591         | 1:200       | V               |
| 74 P38 MAPK (14)                 | p38                 |                        | Cell Signaling | 9212         | 1:100       | V               |
| 75 p38 MAPK (14)                 | p38pT180 Y182       | T180 Y182              | Cell Signaling | 9211         | 1:200       | V               |
| 76 P53                           | p53                 |                        | Cell Signaling | 9282         | 1:3000      | C               |
| 77 Regulatory subunit PI3-Kinase | p85                 |                        | UBI            | 06-195       | 1:4000      | V               |
| 78 P70S6K                        | P70S6K              |                        | Epitomics      | 1494         | 1:500       | V               |
| 79 P70S6K                        | P70S6KpT389         | T389                   | Epitomics      | 1175-1       | 1:250       | V               |
| 80 P90RSK                        | P90RSKpT359         | T359 S363              | Cell Signaling | 9344         | 1:500       | C               |
| 81 PDK1                          | PDK1                |                        | Cell Signaling | 3062         | 1:250       | V               |
| 82 PDK1                          | PDK1pS241           | S241                   | Cell Signaling | 3061         | 1:100       | V               |
| 83 PI3K P110 ALPHA               | PI3K P110 ALPHA     |                        | Epitomics      | 1683         | 1:500       | C               |
| 84 PROGESTERONE RECEPTOR         | PR                  |                        | Epitomics      | 1483-1       | 1:300       | V               |
| 85 RB                            | pRbp807_811         | S807 S811              | Cell Signaling | 9308         | 1:100       | V               |
| 86 PCNA                          | PCNA                |                        | Abcam          | 29100        | 1:1000      | C               |
| 87 PROGESTERONE RECEPTOR         | PR                  |                        | Epitomics      | 1483         | 1:250       | V               |
| 88 PROTEIN KINASE C ALPHA        | PKCA $\alpha$       |                        | Upstate        | 5-154        | 1:2000      | V               |
| 89 PROTEIN KINASE C ALPHA        | PKCA $\alpha$ pS657 | S657                   | Upstate(UBI)   | 06-822       | 1:2000      | C               |
| 90 PTEN                          | PTEN                |                        | Cell Signaling | 9552         | 1:300       | V               |
| 91 RAD51                         | RAD51               |                        | Calbiochem     | 71           | 1:250       | C               |
| 92 S6                            | S6pS235 S236        | S236 S236              | Cell Signaling | 2211         | 1:5000      | V               |
| 93 S6                            | S6pS240 S244        | S240 S244              | Cell Signaling | 2215         | 1:2000      | V               |
| 94 SMAD3                         | SMAD3               |                        | Epitomics      | 1735-1       | 1:200       | V               |
| 95 SRC                           | SRC                 |                        | Upstate        | 05-184       | 1:200       | V               |
| 96 SRC                           | SRCpY416            | Y416                   | Cell Signaling | 2101         | 1:100       | C               |
| 97 SRC                           | SRCpY527            | Y527                   | Cell Signaling | 2105         | 1:400       | V               |
| 98 STAT3                         | STAT3               |                        | Upstate        | 6-596        | 1:500       | VP              |
| 99 STAT3                         | STAT3pS727          | S727                   | Cell Signaling | 9134         | 1:100       | VP              |
| 100 STAT3                        | STAT3pY705          | Y705                   | Cell Signaling | 9131         | 1:500       | V               |
| 101 STAT5                        | STAT5               |                        | Epitomics      | 1289         | 1:250       | V               |
| 102 STAT5                        | STAT5pY694          | Y694                   | Epitomics      | 1208         | 1:250       | VP              |
| 103 STAT6                        | STAT6pY641          | Y641                   | Cell Signaling | 9361         | 1:150       | VP              |
| 104 STATHMIN                     | STATHMIN            |                        | Epitomics      | Jan-72       | 1:500       | V               |
| 105 Spleen Tyrosine kinase       | SYK                 |                        | Santa Cruz     | 1240         | 1:500       | V               |
| 106 Telomerase*                  | Telomerase          |                        | SDI            | 1706         | 1:250       | C               |
| 107 TAZ                          | TAZ                 |                        | Abcam          | 3961         | 1:250       | V               |

| <u>Protein</u>               | <u>RPPA</u>    | <u>Phosphorylation</u> | <u>Company</u> | <u>Cat #</u> | <u>RPPA</u> | <u>Antibody</u> |
|------------------------------|----------------|------------------------|----------------|--------------|-------------|-----------------|
| 108 TRANSGLUTAMINASE         | Transglut      |                        | Neomarker      | MS224        | 1:750       | V               |
| 109 TUBERIN                  | TSC2           |                        | Epitomics      | 1613-1       | 1:500       | V               |
| 110 TUBERIN                  | TSC2pT1462     | T1462                  | Cell Signaling | 3617         | 1:200       | V               |
| 111 VEGFR2                   | VEGFR2         |                        | Cell Signaling | 2479         | 1:700       | V               |
| 112 DNA repair protein XRCC1 | XRCC1          |                        | Cell Signaling | 2735         | 1:100       | C               |
| 113 YES-ASSOCIATED PROTEIN   | YAP            |                        | Santa Cruz     | 15407        | 1:500       | V               |
| 114 14-3-3 beta              | 14-3-3 $\beta$ |                        | Santa Cruz     | 628          |             | V               |
| 115 14-3-3 epsilon           | 14-3-3 Epsilon |                        | Santa Cruz     | 23957        |             | C               |
| 116 14-3-3 zeta              | 14-3-3 Zeta    |                        | Santa Cruz     | 1019         |             | V               |

\* Antibody no longer available

\*\* V=Validated

C=Caution. For further evaluation

VP = Validation pending
